# Hitchhiking in space: ancestry in adapting, spatially-extended populations

Brent Allman<sup>1</sup> and Daniel B. Weissman<sup>\*1,2</sup>

<sup>1</sup>Program on Population Biology, Ecology, and Evolution, Emory  
University, Atlanta, GA 30322

<sup>2</sup>Depts. of Physics and Biology, Emory University, Atlanta, GA  
30322

\*Email: [daniel.weissman@emory.edu](mailto:daniel.weissman@emory.edu)

## Keywords

Population Genetics, Population Structure, Adaptation, Genetic Variation, Models/Simulations, Coalescent Theory

## Author contributions

BA and DBW wrote and analyzed the simulations. DBW designed the project, performed the mathematical analysis, and wrote the paper.

## Acknowledgments

This work would not have been possible without Nick Barton's generous assistance at all stages.

## 1 Abstract

2 Selective sweeps reduce neutral genetic diversity. In sexual populations, this  
3 “hitchhiking” effect is thought to be limited to the local genomic region of the  
4 sweeping allele. While this is true in panmictic populations, we find that in  
5 spatially-extended populations the combined effects of many unlinked sweeps  
6 can affect patterns of ancestry (and therefore neutral genetic diversity) across  
7 the whole genome. Even low rates of sweeps can be enough to skew the spatial  
8 locations of ancestors such that neutral mutations that occur in an individual  
9 living outside a small region in the center of the range have virtually no chance  
10 of fixing in the population. The fact that nearly all ancestry rapidly traces back  
11 to a small spatial region also means that relatedness between individuals falls  
12 off very slowly as a function of the spatial distance between them.

## 13 Introduction

14 In large populations even a fairly low rate of selective sweeps is sufficient to  
15 reduce diversity across most of the genome via hitchhiking (Gillespie, 2000;  
16 Weissman and Barton, 2012). Most modeling of the effects of hitchhiking on  
17 diversity has considered well-mixed populations. However, the effects are po-  
18 tentially quite different in spatially-extended populations with only short-range  
19 dispersal, because instead of quickly fixing through logistic growth, sweeps must  
20 spread out in a spatial wave of advance over the whole range (Fisher, 1937). Bar-  
21 ton et al. (2013) recently showed that this increase in the time to sweep tends  
22 to reduce the size of the genomic region over which diversity is depressed by a  
23 sweep. While the effect of sweeps on genetic diversity at linked loci is therefore  
24 reduced by spatial structure, we show here that collective effect of sweeps on  
25 the diversity at *unlinked* loci can be much stronger than in panmictic popula-  
26 tions. Surprisingly, this effect is dependent on the geometry of the range – it  
27 only appears for realistic range shapes with relatively well-defined central re-  
28 gions, not for the perfectly symmetric idealizations of ring-shaped and toroidal  
29 ranges often used in theoretical models. In particular, we find that probability  
30 of fixation of an allele can be strongly position-dependent, with alleles near the  
31 center of the range orders of magnitude more likely to fix than those at typical  
32 locations. This is because all individuals trace most of their ancestry, even in  
33 the not-too-distant past, to individuals living in the center, which also causes  
34 far-away individuals to be much more closely related to each other than they  
35 would be in the absence of the unlinked sweeps, with relatedness falling off only  
36 as a power law of distance rather than exponentially.

## 37 Model

38 We wish to find the expected number of copies that an allele found in an individ-  
39 ual at spatial position  $\mathbf{x}$  will leave far in the future, i.e., its reproductive value  
40 (Barton and Etheridge, 2011), which we denote  $\phi(\mathbf{x})$ . Equivalently,  $\phi(\mathbf{x})\rho(\mathbf{x})$ ,

41 where  $\rho$  is the population density, is the probability density of a present-day indi-  
42 vidual’s ancestor being at location  $\mathbf{x}$  at some time in the distant past. Maruyama  
43 (1970) showed that in the absence of selection,  $\phi(\mathbf{x}) \equiv 1$  regardless of the details  
44 of the population structure, as long as dispersal does not change expected allele  
45 frequencies. Here we show that this result does not extend to populations un-  
46 dergoing selection. Populations living in perfectly symmetric ranges (circles in  
47 one dimension, tori in two) necessarily have  $\phi(\mathbf{x}) \equiv 1$ , but when this symmetry  
48 is broken, recurrent sweeps can make reproductive value strongly dependent on  
49 spatial position, with high  $\phi$  in a small region in the center of the range and  
50 very small  $\phi$  everywhere else.

51 We consider a population with uniform, constant density  $\rho$  distributed over  
52 a  $d$ -dimensional range with radius  $L$ , with uniform local dispersal with diffusion  
53 constant  $D$ , i.e.,  $2D$  is the mean squared displacement after unit time. We  
54 assume that selective sweeps with advantage  $s$  occur in the population at a  
55 rate  $\Lambda$  per generation, originating at points uniformly distributed over time and  
56 space, and at loci uniformly distributed over the genome. As long as the density  
57 is sufficiently high ( $\rho \gg (s/D)^{d/2}/s$ , Nagylaki (1978); Barton et al. (2013)),  
58 they will spread roughly deterministically in waves with speed  $c \approx 2\sqrt{Ds}$  with  
59 characteristic wavefront width  $l \approx \sqrt{D/s}$  (Fisher, 1937), which we take to  
60 be much smaller than the range size,  $l \ll L$ . (However, even for fairly large  
61 densities, the stochastic corrections to  $c$  can be substantial; see Eq. 16 in the  
62 Methods.) We assume that  $\Lambda$  is low enough compared to the frequency of  
63 outcrossing,  $f$ , and the average number of crossovers per outcrossing,  $K$ , that  
64 the waves do not interfere with each other. For well-mixed populations, this  
65 means that  $\Lambda \ll fK$  (Weissman and Barton, 2012); we are currently preparing  
66 a manuscript in which we show that spatially-extended populations have nearly  
67 the same limit on  $\Lambda$ , up to logarithmic factors. The definitions of symbols are  
68 collected in Table 1.

## 69 One and two dimensions

70 We consider both one-dimensional ranges (lines with length  $2L$ ) and two-dimensional  
71 ranges. In two dimensions, the shape of the range will have some effect on many  
72 of our results; however, as long as the shape is fairly “nice”, with a clear center  
73 and single characteristic length scale  $L$ , this effect will be modest. We will there-  
74 fore ignore it for simplicity. For our purposes, the main difference between one  
75 and two dimensions will be in the density of individuals a distance  $x$  from the  
76 center,  $\rho(x)$ . Since we are assuming a uniform spatial density, in one dimension  
77 this is just  $\rho$ , a constant. In two dimensions, however, we must account for the  
78 fact that there is more area at larger  $x$ , and thus  $\rho(x) \approx 2\pi x\rho$ . (Necessarily,  
79  $\rho(x > L) = 0$  in both one and two dimensions.)

Table 1: Symbol definitions

| Symbol                                                                                                                                                                                                                                                                  | Definition                                                                    |
|-------------------------------------------------------------------------------------------------------------------------------------------------------------------------------------------------------------------------------------------------------------------------|-------------------------------------------------------------------------------|
| $d$                                                                                                                                                                                                                                                                     | Number of spatial dimensions (1 or 2)                                         |
| $\rho$                                                                                                                                                                                                                                                                  | Density of individuals (individuals / (distance) <sup><math>d</math></sup> )* |
| $L$                                                                                                                                                                                                                                                                     | Radius of range*                                                              |
| $D$                                                                                                                                                                                                                                                                     | Dispersal constant*                                                           |
| $f$                                                                                                                                                                                                                                                                     | Frequency of outcrossing                                                      |
| $K$                                                                                                                                                                                                                                                                     | Expected number of crossovers per outcrossing                                 |
| $s$                                                                                                                                                                                                                                                                     | Selective advantage of adaptive alleles                                       |
| $\Lambda$                                                                                                                                                                                                                                                               | Frequency of selective sweeps                                                 |
| $c \approx 2\sqrt{Ds}$                                                                                                                                                                                                                                                  | Expected rate of advance of a sweeping beneficial allele                      |
| $l \approx \sqrt{D/s}$                                                                                                                                                                                                                                                  | Characteristic width of the wave of advance of a sweep                        |
| $\phi(x)$                                                                                                                                                                                                                                                               | Reproductive value of individuals at location $x$                             |
| $\psi(x)$                                                                                                                                                                                                                                                               | Identity-by-descent between individuals separated by $x$                      |
| *In continuous space. In the corresponding model of discrete demes on a square lattice, $\rho$ is the deme size, $L$ is the radius in demes, and $D$ is half the rate of migration into a deme, i.e., $d$ times the migration rate between a pair of neighboring demes. |                                                                               |

## Results

80  
81 In spatially-extended populations, genetic hitchhiking not only changes the fre-  
82 quency of neutral alleles, but also shifts their distribution in space. To see this,  
83 consider the ancestry of a lineage going backward in time, so that sweeps ap-  
84 pear as receding waves. When one passes over the focal lineage, it “pulls” it  
85 back towards origin of the sweep at the same speed  $c$  as the wave. If there  
86 is no recombination, the lineage will necessarily be pulled all the way back to  
87 the origin (i.e., all present-day individuals necessarily descend from the original  
88 mutant at the swept locus), but if recombination is frequent, the lineage will be  
89 pulled only a short distance before recombining out of the wave and stopping.  
90 If recombination occurs at rate  $r$ , then we expect that the lineage will remain in  
91 the wavefront for a time of  $\mathcal{O}(1/r)$  before recombining, and therefore be pulled  
92 a distance of  $\sim c/r$  towards the origin of the sweep. For most positions in most  
93 realistic range shapes, sweeps tend to arrive (forward in time) from the direction  
94 of the center of the range, and so pull the ancestry back towards the center; the  
95 collective effect of many sweeps is then to concentrate the ancestry in the center.

96 To make this description more quantitative, it will be convenient to classify  
97 sweeps based on their genetic map distance  $r$  to the focal locus. We will refer  
98 to sweeps at  $r \ll s$  as *tightly-linked* and those at  $r \gg s$  as *loosely-linked*.  
99 Barton et al. (2013) found that a tightly-linked sweep pulls a lineage a distance  
100 that is approximately exponentially distributed with mean  $c/r$ , going backward  
101 in time, with an upper cutoff at the distance to the origin of the sweep. In  
102 this paper, we calculate the effect of a loosely-linked sweep and find that the  
103 lineage is only pulled an expected distance  $c/2r$  (see Methods). To calculate

104 the net effect of hitchhiking on a locus over time, we need to integrate over  
105 all sweeps occurring across the genome at different recombination fractions  $r$ .  
106 The  $1/r$  dependence for the expected pull suggests that this net effect should  
107 be dominated by some combination of a few very tightly-linked sweeps and  
108 the many very loosely-linked sweeps (rather than the moderately-linked sweeps  
109 with  $r \sim s$ ). This actually overstates the importance of tightly-linked sweeps,  
110 since the  $1/r$  dependence has an upper cutoff for  $r \lesssim L/c$ , and understates  
111 the importance of loosely-linked sweeps, since even if a sweep occurs very far  
112 away on the genome the recombination fraction cannot exceed  $f/2$ . Thus we  
113 expect that if the genome is sufficiently long (in a sense that will be made  
114 more precise below), the total average displacement of a typical locus will be  
115 dominated by loosely-linked sweeps. We will begin by focusing on this case,  
116 making the further approximation that most sweeps are not just loosely-linked  
117 but unlinked ( $r = f/2$ ), as will be the case for even moderately long genomes,  
118  $K \gtrsim 1$ . This case is also relevant for loci that are far from all loci undergoing  
119 selection, i.e., the ones whose evolution might be expected to depend only on  
120 demography. It also describes bacterial populations in which recombination  
121 primarily involves relatively short lengths of DNA, so that most pairs of loci in  
122 the genome recombine at roughly the same rate, as long as this recombination  
123 is still rapid relative to selection (the “quasisexual” case, Rosen et al. (2015)).

## 124 The pull of unlinked sweeps

125 For a lineage a distance  $x$  from the center, there is an excess of approximately  
126  $\sim \Lambda x/L$  sweeps per generation pulling it back toward the center, each of which  
127 pulls it an expected distance  $c/f$ . (Note that the effect of the upper cutoff on  
128 the displacement from these sweeps is negligible as long as  $L \gg c/f$ .) The  
129 expected distance from the center therefore decays exponentially (backward in  
130 time) like

$$\bar{x} \approx x_0 \exp\left(-\frac{\Lambda c}{Lf}t\right). \quad (1)$$

131 This implies that there is a characteristic concentration time  $t_{\text{con}}$  beyond which  
132 ancestry is significantly altered by the collective effect of unlinked sweeps:

$$t_{\text{con}} = \frac{Lf}{\Lambda c}. \quad (2)$$

133 This deterministic move back to the center is opposed by dispersal, and  
134 also by the effect of occasional tightly-linked sweeps which pull the lineage a  
135 distance  $\sim L$ , effectively randomizing its position. The balances between these  
136 forces means that the ancestry of the population is not completely concentrated  
137 at the center of the range, but is instead distributed around it in some region of  
138 size  $\sim x_c$ . Figure 1 shows this rapid concentration followed by a balance with  
139 dispersal and tightly-linked sweeps.

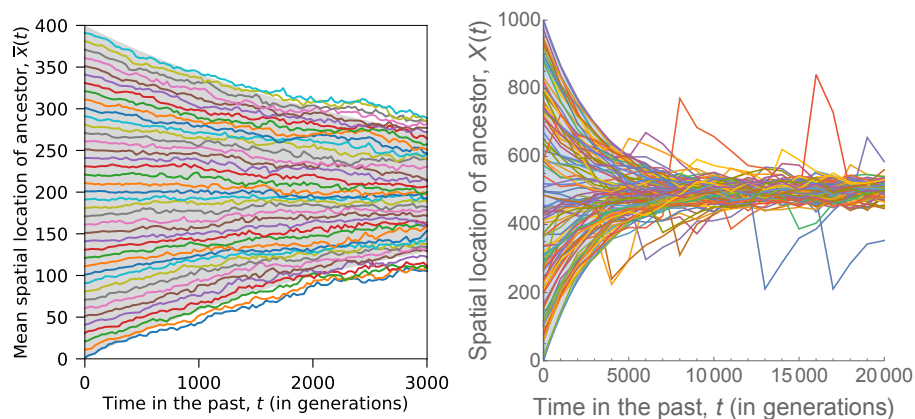

Figure 1: Tracing the ancestry of a neutral locus in a single individual back through time. Individuals throughout the range rapidly trace their ancestry back to a small region in the center of the range. Curves show simulations, while shaded regions show analytical predictions, Eq. 1. Left: Exact forward-time simulations. Each curve is the mean location of the ancestors of all individuals in a given present-day deme, averaged over three independent simulation runs. Parameters are  $L = 200$ ,  $s = 0.05$ ,  $D = 0.25$ ,  $f = 1$ ,  $\rho = 300$ , and  $\Lambda \approx 0.6$  (so that  $t_{\text{con}} \approx 3000$ ), with all loci unlinked. The discrepancy between the analytical prediction and the simulations at older times is an artifact caused by loss of resolution in the simulations as genetic diversity is exhausted (see Methods). Right: Approximate backward-time simulations. Each curve is an independent simulation of the ancestry of a single present-day individual. While the width of the central region is determined by a balance between dispersal and the pull of unlinked sweeps, the occasional excursions out of the center are due to hitchhiking on tightly-linked sweeps. Parameters are  $L = 500$ ,  $s = 0.05$ ,  $D = 0.125$ ,  $\Lambda = 1$ ,  $f = 1$ ,  $K = 300$ .

## 140 Balance with dispersal

141 If tightly-linked sweeps are relatively rare, either because the overall rate of  
142 sweeps is low or because the focal locus lies in a region of the genome that is  
143 not undergoing much adaptation, the main balance will be between the diffusive  
144 effect of dispersal and the pull of unlinked sweeps. In this case, the position of  
145 the ancestry is an Ornstein-Uhlenbeck process, i.e., if we denote the position  
146 of the ancestral lineage  $t$  generations in the past by  $X_t$ , it evolves backward in  
147 time as:

$$dX_t = -t_{\text{con}}^{-1} X_t dt + \sqrt{2D} dB_t,$$

148 where  $B_t$  is a Brownian motion. By Fick's first law of diffusion, the diffusive  
149 flux of ancestry is  $-D\nabla\phi(x)$ . In the stationary state this must exactly cancel  
150 the deterministic pull of unlinked sweeps, so far in the past the distribution of  
151 ancestry is normal and concentrated in the center of the range according to:

$$\phi(x) \propto \exp\left(-\frac{x^2}{2x_c^2}\right), \text{ with } x_c = \sqrt{Dt_{\text{con}}} = \sqrt{\frac{fl}{2\Lambda L}} L. \quad (3)$$

152 Eq. 3 holds in both one and two spatial dimensions (although recall that in two  
153 dimensions we are ignoring corrections that depend on the exact shape of the  
154 range) and corresponds to a root mean square distance to the center of  $\sqrt{d}x_c$ . If  
155  $x_c \ll L$ , then the reproductive value of an individual at the center of the range  
156 can be orders of magnitude higher than one at a typical distance  $\sim L/2$   
157 from the center (Fig. 2).

158 From Eq. 3, we see that the ancestral range will be substantially reduced  
159 by selection if the rate of sweeps per sexual generation is greater than the  
160 ratio of the cline width to the range size:  $\Lambda/f > l/L$ . It is unclear what  
161 ranges these ratios take in natural populations.  $\Lambda/(fK)$  is unlikely to be much  
162 more than  $\mathcal{O}(1)$  (Weissman and Barton, 2012), but in organisms with many  
163 chromosomes (large  $K$ ),  $\Lambda/f$  may be substantial. Looking at the right-hand  
164 side of the inequality, modeling sweeping alleles by waves spreading across the  
165 range necessarily requires  $l/L \ll 1$ , so even small values of  $\Lambda/f$  may be enough  
166 to distort the distribution of ancestry. Surprisingly little is known about typical  
167 values of  $l$  for the waves of advance of sweeping alleles in nature, but it seems  
168 plausible that for many species it should be much smaller than the total species  
169 range (Fisher, 1937). For the spread of insecticide resistance in *Culex pipiens*  
170 in southern France, the width of the wave of advance was  $\sim 20$  km (Lenormand  
171 et al., 1999), much smaller than the global scale of the species range, but the  
172 dynamics were more complex than a simple selective sweep (Labbé et al., 2007).  
173 Much more is known about the width of stable clines and hybrid zones, which  
174 are frequently much smaller than species ranges (Barton and Hewitt, 1985). To  
175 the extent that the selection maintaining them is comparable in strength to  
176 the selection driving sweeps, these should have roughly the same width as the  
177 wavefronts.

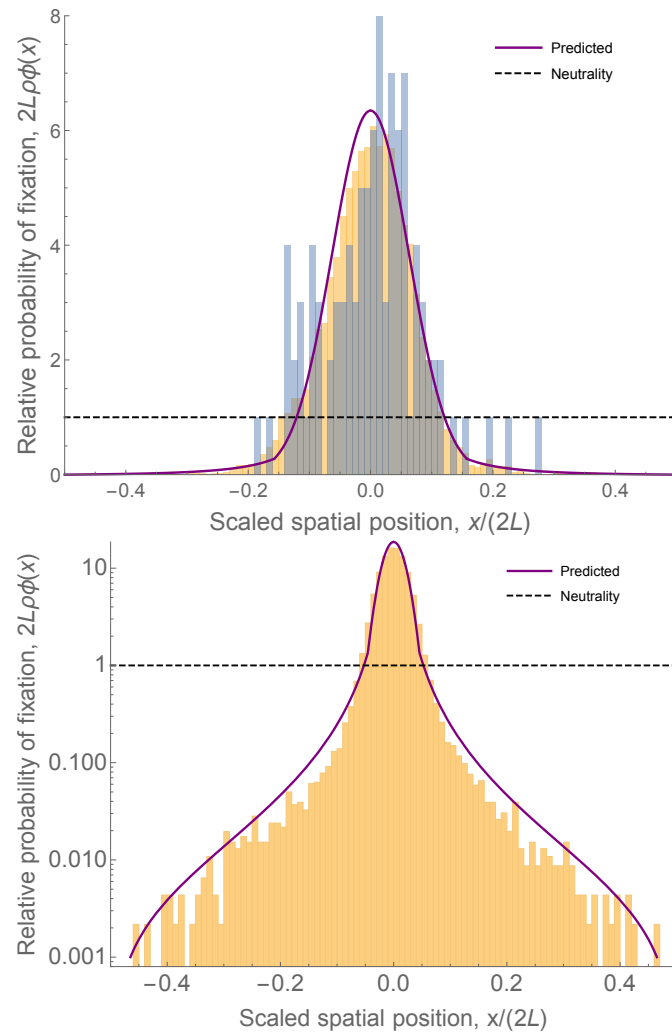

Figure 2: Hitchhiking due to unlinked sweeps concentrates ancestry in the center of the range. The plot shows the probability of that the distant ancestor of a neutral allele was at location  $x$ , or, equivalently, the fixation probability of a new mutation occurring at  $x$ . Probabilities are shown on a linear (top) and log (bottom) scale. Histograms show the results of exact forward-time simulations (blue, top panel only) and approximate backward-time simulations (gold). The purple curve shows the predicted distribution: a normal distribution (Eq. 3) inside the center, crossing over to a power law outside (with an additional downturn near the boundaries, Eq. 4), with the crossover between the regimes at the value of  $x$  at which Eq. 3 and Eq. 4 match. The dashed black line shows a uniform distribution. Parameters for the top panel are  $L = 500$ ,  $\rho = 100$ ,  $s = 0.05$ ,  $D = 0.125$ ,  $\Lambda = 0.1$ ,  $f = 1$ ,  $K = 100$ . Parameters for the bottom panel are as in the right panel of Fig. 1.



## 178 Balance with tightly-linked sweeps

179 Finding the balance between concentrating effect of unlinked sweeps and the  
180 randomizing effect of tightly-linked sweeps is slightly trickier, and we do not  
181 know of an exact expression for  $\phi(x)$ . However, we can find an approximate  
182 expression by using the fact that the mean squared displacement of the ancestral  
183 lineage due to linked sweeps is dominated by rare very tightly-linked sweeps  
184 rather than the many loosely-linked ones (Barton et al., 2013). This suggests  
185 that for large  $x$ , the probability that an individual’s ancestor was farther than  
186  $x$  from the center at time  $t_0$  in the distant past is roughly just the probability  
187 that a single very tightly-linked sweep pulled it there at some time within  $\sim t_{\text{con}}$   
188 generations of  $t_0$ . Since the distance that a sweep at recombination fraction  $r$   
189 pulls the lineage goes like  $1/r$ , the rate of sweeps close enough on the genome  
190 to pull the ancestry a distance of at least  $x$  falls off like  $1/x$ . Therefore, the  
191 probability of finding the ancestry at a distance of at least  $x$  should also fall off  
192 like  $1/x$ ; the probability density of being exactly at  $x$ ,  $\phi(x)\rho(x)$ , should then  
193 fall off like  $1/x^2$ .

194 In the Methods, we calculate this more formally, and find:

$$\phi(x)\rho(x) \approx \frac{2L(1 - (x/L)^d)}{Kx^2} \text{ for } x \gg x_c = 2L/K. \quad (4)$$

195 The factor  $1 - (x/L)^d$  (where  $d = 1$  or  $2$  is the dimension of the habitat) reflects  
196 the fact that for very large  $x$ ,  $x \sim L$ , most sweeps start at distances less than  
197  $x$  and cannot pull the lineage that far from the center. For  $x \ll x_c = 2L/K$ ,  
198 lineages will tend to experience many sweeps pulling them distances greater  
199 than  $x$  in time  $\sim t_{\text{con}}$ , so the approximation used to derive Eq. 4 breaks down;  
200 for these small values of  $x$ , the randomizing effects of moderately-linked sweeps  
201 smooth out  $\phi(x)$  and make it roughly constant.

202 Barton et al. (2013) describe the randomizing effect of tightly-linked sweeps  
203 by “ $D_{\text{eff}}$ ,” an effective dispersal rate, with  $D_{\text{eff}} \approx \frac{16L\Lambda}{3lKf} D$  (their Eq. (9)). Com-  
204 paring Eqs. 3 and 4, however, we see that their effect cannot simply be described  
205 as an increase in the dispersal rate, since they create a much longer tail in the  
206 spatial distribution of ancestry. Because of this, it is possible that while the  
207 bulk of the distribution of ancestry is determined by a balance between unlinked  
208 sweeps and dispersal, with linked sweeps too rare to make a difference, linked  
209 sweeps make the dominant contribution to the tails of the ancestry distribution  
210 (Fig. 2, bottom).

## 211 Combining dispersal and tightly-linked sweeps

212 Combining Eqs. 3 and 4, we see that unlinked sweeps reduce the effective size  
213 of the ancestral range by a factor  $x_c/L$ :

$$\frac{x_c}{L} \approx \max \left\{ \sqrt{\frac{fl}{2\Lambda L}}, \frac{2}{K} \right\}. \quad (5)$$

214 For typical numbers of chromosomes  $K$ , it would seem that ancestry could be  
215 concentrated by about an order of magnitude. However, the result  $2/K$  was  
216 derived under the assumption that sweeps are distributed uniformly across the  
217 genome. If, on the other hand, adaptation is mostly occurring in just a few  
218 genes, the rest of the genome will not experience any tightly-linked sweeps, and  
219 ordinary dispersal will be the only force counteracting the concentration, mean-  
220 ing that the effect could potentially be much stronger. This has the surprising  
221 implication that selection can have a stronger effect on some features of the  
222 spatial distribution of ancestry at far-away loci than at those nearby.

### 223 Effect on diversity

224 While the effect of recurrent sweeps on neutral diversity can be quite large,  
225 detecting the effect in data from real populations may be tricky. It might seem  
226 to be indistinguishable from a range expansion in the absence of time-series  
227 data, but there is a simple way to tell them apart: under recurrent sweeps,  
228 there is no serial founder effect reducing diversity away from the center. One  
229 way to see this is by looking at isolation by distance. The probability  $\psi(x)$   
230 that two individuals separated by a distance  $x$  are genetically identical can be  
231 written in terms of the neutral mutation rate  $\mu$  and their coalescence time  $T$  as

$$\psi(x) = E [e^{-2\mu T} \mid x]. \quad (6)$$

232 For  $x$  large compared to the size of a single deme (i.e., the spatial scale  
233 over which individuals interact within a generation) and loci far on the genome  
234 from any recent sweeps, there are two simple regimes for Eq. 6. If individuals  
235 are close together and  $\mu T \gg 1$ , then we expect that the pull due to sweeps  
236 is too slow to cause lineages to coalesce before they mutate, and  $\psi(x)$  is  
237 just given by the neutral value,  $\psi(x) \propto x^{(1-d)/2} e^{-\sqrt{\mu/D}x}$  (Barton et al., 2002),  
238 which says that the probability of identity falls off rapidly with distance. On  
239 the other hand, larger values of  $x$  are quickly collapsed by the pull of sweeps  
240 in time  $\sim t_{\text{con}} \log(x/x_c)$ , so we expect that  $\psi$  should be of the form  $\psi(x) \propto$   
241  $x^{-2\mu t_{\text{con}}}$ . A detailed calculation (see Methods) confirms that this is true for  
242  $x \gg x_c \sqrt{2 + 4\mu t_{\text{con}}}$ ; the results are also confirmed by simulations, as shown in  
243 Fig. 3. The probability of identity thus has a long tail in distance – if  $\mu t_{\text{con}}$   
244 is small, individuals at opposite sides of the range (separated by  $\approx 2L$ ) are  
245 nearly as related as individuals separated by, say,  $L/2$ . Notice that  $\psi$  does not  
246 depend on from where in the range we sampled the pair of individuals. This  
247 implies that, while reproductive value is concentrated in the center of the range,  
248 genetic diversity is more evenly spread, distinguishing this scenario from a range  
249 expansion.

250 When  $x \gg x_c$ , we can approximately invert Eq. 6 to find the distribution  
251 of the coalescence time  $T$  for one-dimensional ranges. In the Methods, we find  
252 that the lineages deterministically approach to within  $\sim x_c$  of each other in  
253 time  $\sim t_{\text{con}} \log(x/x_c)$ , after which they coalesce at roughly the same rate as  
254 they would in a neutral, well-mixed population of size  $\approx 2\sqrt{\pi}\rho x_c \equiv 1/\lambda$ . For

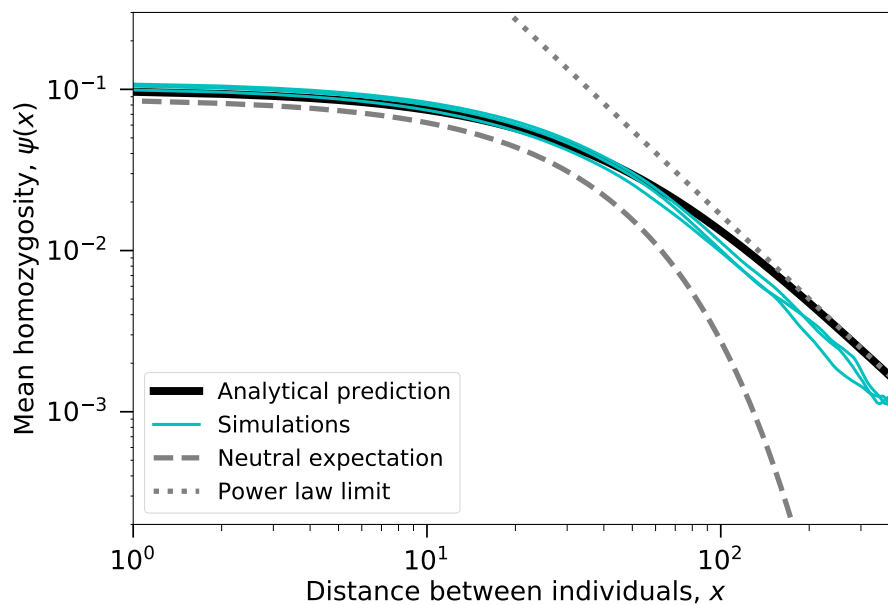

Figure 3: Relatedness between distant individuals has a power-law tail. Expected identity-by-descent  $\psi$  between a pair of sampled individuals is shown as a function of the distance  $x$  between them. Cyan curves show the results of three independent forward-time simulations. The solid black curve shows the full analytical prediction, Eq. 25. For large  $x$ , this approaches a power law,  $\psi \propto x^{-2\mu t_{\text{con}}}$  (dotted gray line). This is far higher than it would be in the absence of sweeps, in which case  $\psi$  would fall off exponentially at rate  $\sqrt{\mu/D}$  (dashed gray curve). Parameters are as in the left panel of Fig. 1, with  $\mu = 3 \times 10^{-4} \approx 1/t_{\text{con}}$ .

255 comparison, in a purely neutral one-dimensional population with strong spatial  
256 structure ( $L \gg D\rho$ ), the long-term rate of coalescence is  $\lambda_{\text{neut}} = \pi^2 D / (8L^2)$   
257 (Maruyama, 1971), so hitchhiking greatly increases the rate of coalescence:  
258  $\lambda / \lambda_{\text{neut}} \sim (L/D\rho)(L/x_c) \gg 1$ . We can also compare the rate of coalescence  
259 to that in a well-mixed population with the same pattern of adaptive substi-  
260 tutions. While Barton et al. (2013) showed that spatial structure reduces the  
261 coalescence caused by tightly-linked sweeps, for loosely-linked sweeps it can have  
262 the opposite effect. In well-mixed populations, unlinked sweeps only substan-  
263 tially increase the rate of coalescence when they become so frequent that they  
264 begin to interfere with each other ( $\Lambda \sim f^2/s$ ) (Weissman and Barton, 2012); for  
265 large ranges, coalescence will be increased (i.e.,  $x_c \ll L$ ) at much lower values  
266 of  $\Lambda$  than this.

267 So far in our discussion of diversity, we have ignored loci that are close to  
268 recent sweeps. If we are considering large enough loci so that  $\mu t_{\text{con}} \gg 1$ , then  
269 usually only these recently swept regions will be identical between individuals  
270 from different parts of the range. In this case, because each sweep causes co-  
271 alescence between individuals separated by a large distance  $x$  over a region of  
272 genome with length  $r \propto 1/x$  (Barton et al., 2013),  $\psi$  should still have a long  
273 tail, but with an exponent that is independent of the population parameters,  
274  $\psi \propto 1/x$  (see Methods). This characteristic exponent is another effect of rare,  
275 tightly-linked sweeps that cannot be accounted for by any effective dispersal  
276 rate  $D_{\text{eff}}$ .

## 277 Discussion

278 Because selection and demography are often difficult or impossible to measure  
279 directly in natural populations, both are typically inferred from patterns of  
280 genetic diversity. This inference can be difficult, because the two processes can  
281 produce similar signals. For instance, both purifying selection and population  
282 expansion tend to produce site frequency spectra with a relative excess of rare  
283 alleles. In order to tease apart the two factors, demography is often first inferred  
284 using data from loci that are thought to be neutral, and then the answer is used  
285 to infer the pattern of selection at the remaining loci. However, in order for the  
286 demography to be inferred correctly, this method requires that the first set of  
287 loci be not just neutral, but also unaffected by selection at linked loci. Typically,  
288 this is done by using loci that are far from sites where selection is thought to  
289 have been important (e.g., Sattath et al. (2011)). Our results suggest that  
290 this may be problematic in spatially-structured populations – even diversity at  
291 these loci may be strongly affected by unlinked sweeps. Instead, selection and  
292 demography should be inferred simultaneously.

## 293 Geometry, not topology

294 Our results might seem to show that the genetic diversity in a population de-  
295 pends sensitively on the topology of the range and can therefore change dras-

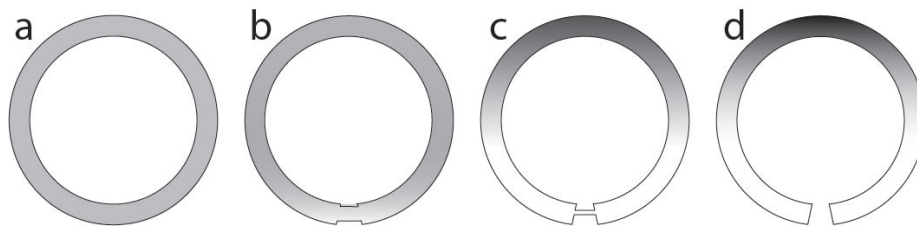

Figure 4: The distribution of ancestry depends smoothly on the shape of the range as it deforms from a perfectly symmetric circle (a) to a curve with endpoints (d). Shading is a schematic representation of the reproductive value of each location, from high (dark) to low (light). In (a), the ancestry is necessarily evenly distributed. Slight asymmetries in the range (b) introduce slight differences in the distribution of ancestry. When the range has a well-defined middle, the ancestry is concentrated there, regardless of whether there is a weak connection between the ends of the range (c) or a strict break (d).

296 tically as the result of small perturbations to the environment. For example,  
297 a circular range (which by symmetry has no concentration of ancestry) can be  
298 transformed into a linear one (with very concentrated ancestry) by removing a  
299 single point. However, this is a misleading interpretation. In fact, a “circular”  
300 range is an annulus with radius large compared to its thickness (Fig. 4a). A  
301 small perturbation that slightly reduces the population in one part of the range  
302 will only have a correspondingly small effect on the distribution of ancestry  
303 (Fig. 4b), and the bias of the ancestry increases smoothly as the per-  
304 turbation grows (Fig. 4c), until the annulus is completely pinched off (Fig. 4d).  
305 More generally, the common-sense intuition that the pattern of diversity should  
306 not depend on the details of the shape of the range is correct. All that matters  
307 is that, in at least some parts of the range, sweeps are more likely to come from  
308 some directions than others. If we consider the vector field defined by the net  
309 flow of sweeps, ancestry/reproductive value will tend to concentrate around crit-  
310 ical points with positive divergence. (Technically, the distribution of ancestry  
311 will evolve according to a convection-diffusion equation.) For the simple range  
312 shapes with uniformly distributed sweeps that we have considered in this paper,  
313 this occurs in the center of the range. If instead sweeps tended to originate from  
314 one end of the range (e.g., if they tend to be introgressed alleles from a hybrid  
315 zone), ancestry would concentrate there instead.

## 316 Extensions

317 We have focused on a very simple population model. Here we consider several  
318 possible modifications. First, we have assumed that the density  $\rho$  is constant  
319 in time. If density fluctuations typically occur on timescales longer than  $t_{\text{con}}$ ,  
320 this approximation should be accurate, and if they are rapid compared to the  
321 sweep time  $L/c$  they should average out, but it is unclear how fluctuations on

322 moderate timescales should interact with dynamics discussed here.

323 We have also neglected the possibility of rare long-range dispersal. Tightly-  
324 linked sweeps already effectively produce occasional long-range jumps in the  
325 ancestry of neutral sites, so adding long-range dispersal might not have a large  
326 direct effect, but it can have dramatic effects on how sweeps spread (Hallatschek  
327 and Fisher, 2014), and therefore a large indirect effect on the hitchhiking dy-  
328 namics. It is not clear what this effect should be – on the one hand, the sweeps  
329 will spread faster, increasing their pull, but on the other hand, the direction of  
330 that pull may be less reliably towards the center.

331 We have also neglected the possibility that many sweeps may be “soft”,  
332 starting from multiple alleles (Hermisson and Pennings, 2005), which are likely  
333 to be particularly common in spatially-extended populations (Ralph and Coop,  
334 2010). If these alleles typically descend from a recent single ancestor, i.e. are  
335 concentrated in a small region at the time when they begin to sweep, then  
336 the results should be essentially unchanged, with the possible exception of the  
337 coalescent effects of tightly-linked sweeps. The same should be true if sweeps  
338 are “firm”, i.e., multiple mutant lineages contribute to each sweep, but the most  
339 successful one typically colonizes most of the population. But sweeps in which  
340 many widely-spread mutations contribute equally would likely not consistently  
341 concentrate ancestry in space.

342 We have focused on the effect of sweeps on neutral variation, but they will  
343 of course also affect selected alleles. Most obviously, if recombination is limited  
344 they will interfere with each other (Martens and Hallatschek, 2011). They will  
345 interfere even more strongly with weakly-selected variants. We will address  
346 these issues in a subsequent manuscript.

## 347 **Methods**

### 348 **Simulations**

349 Forward-time simulations (blue histogram in Fig. 2, left panel in Fig. 1, and  
350 Fig. 3) were conducted using the algorithm from Weissman and Barton (2012)  
351 (which draws on that of Kim and Stephan (2003)), modified so that popula-  
352 tion was subdivided into a line of  $L$  demes of  $\rho$  individuals each, with random  
353 dispersal between adjacent demes. For Figs. 1 and 3, loci were taken to be  
354 unlinked (i.e., at a recombination fraction  $f/2$  with each other). Because these  
355 simulations were extremely computationally demanding, we also conducted ap-  
356 proximate backward-time simulations to get better statistics and investigate  
357 rare events (right panel of Fig. 1 and gold histograms in 2). These simulations  
358 followed a lineage back in time at one neutral locus as it diffused through a  
359 continuous one-dimensional space. Sweeps were treated as instantaneous events  
360 arising uniformly at random in space and time, with no interference among them.  
361 Sweeps occurring at a recombination fraction  $r$  from the focal locus pulled each  
362 lineage an exponentially-distributed distance with mean  $c/r$  or  $c/(2r)$  (for  $r < s$   
363 and  $r > s$ , respectively), truncated at the origin of the sweep. For the backward-

364 time simulations in Fig. 1 and all simulations in Fig. 2, the focal locus was at  
365 the center of a linear genome with map length  $K$  Morgans with sweeps arising  
366 uniformly at random across the genome.

### 367 Calculating the “pull” of an loosely-linked sweep

368 We would like to find the expected spatial displacement of a lineage caused  
369 by an loosely-linked sweep, tracing backward in time. To do so, suppose that  
370 we sample an allele in a present-day individual in the middle of a very large  
371 one-dimensional range, and that a long time ago a selective sweep occurred at  
372 a locus a recombination fraction  $r$  away from the focal allele, starting a very  
373 long distance away from our sample. We wish to find the expected location of  
374 the ancestor of the sampled allele before the sweep began. Let  $p(x, \tau)$  be the  
375 probability density for finding the ancestor at location  $x$   $\tau$  generations in the  
376 past, with  $x = 0$  corresponding to the present location. We want to find:

$$\begin{aligned} \lim_{\tau \rightarrow \infty} \langle X \rangle &\equiv \lim_{\tau \rightarrow \infty} \int dx x p(x, \tau) \\ &= \int d\tau \int dx x \partial_\tau p(x, \tau). \end{aligned} \quad (7)$$

377 To find  $\partial_\tau p$ , first define  $p_i(x, \tau)$  as the probability density that the ancestor  
378 was at location  $x$  and in genetic background  $i$ , where  $i = 0$  is the ancestral  
379 genetic background, and  $i = 1$  is the background with the allele that swept.  
380 (Note  $p = p_0 + p_1$ .) If we define  $u(x, \tau) \equiv u_1(x, \tau)$  and  $u_0(x, \tau)$  to be the  
381 frequencies of the sweeping allele and the background allele, respectively, with  
382  $u_1 + u_0 = 1$ ,  $p_i$  satisfies the partial differential equation

$$\partial_\tau p_i = r(u_i p_{1-i} - u_{1-i} p_i) + D \partial_x (\partial_x p_i - 2p_i \partial_x \log u_i). \quad (8)$$

383 The first term on the right-hand side is the backward-time version of the decay  
384 in linkage disequilibrium due to recombination. The second term is backward  
385 diffusion; see Appendix A of Hallatschek and Nelson (2008). (Note that their  
386 Eq. (3) differs from our Eq. 8 because it includes an additional deterministic drift  
387 term due to their use of the co-moving frame of the sweep.) The piece containing  
388  $\partial_x \log u_i$  accounts for the fact that the diffusion is biased towards the direction of  
389 increasing frequency of the focal genotype, because migrants of a given genotype  
390 are more likely to come from a location where that genotype is frequent than  
391 one where it is rare. Technically, in models with discrete generations, Eq. 8 only  
392 applies when the recombination rate per generation is small, but we will use it  
393 for unlinked loci anyway.

394 The equivalent of linkage disequilibrium in this system is  $\Delta \equiv u_0 p_1 - u_1 p_0$ ;  
395 we expect it to be small for large  $r$ . Using  $\Delta$  to change variables back to  $p$ ,  
396 Eq. 8 becomes

$$\partial_\tau p = D\partial_x \left( \partial_x p - 2\frac{\partial_x u}{u(1-u)}\Delta \right) \quad (9)$$

$$\begin{aligned} \partial_\tau \Delta = & -r\Delta + D\partial_x^2 \Delta - (\partial_\tau u + D\partial_x^2 u)p \\ & + 2(2u-1)D\partial_x \left( \frac{\partial_x u}{u(1-u)}\Delta \right) + 2D\frac{\partial_x u}{u(1-u)}\Delta \end{aligned} \quad (10)$$

397 Plugging Eq. 9 into Eq. 7, we have

$$\begin{aligned} \lim_{\tau \rightarrow \infty} \langle X \rangle &= D \int d\tau \int dx x \partial_x \left( \partial_x p - 2\frac{\partial_x u}{u(1-u)}\Delta \right) \\ &= 2D \int d\tau \int dx \frac{\partial_x u}{u(1-u)}\Delta, \end{aligned} \quad (11)$$

398 where we have used integration by parts and the fact that  $p(\pm\infty, \tau) = 0$ . It  
399 now remains to find an expression for  $\Delta$ . Eq. 10 is quite complicated, but for  
400 large  $r$  we will have  $\Delta \ll p$  and the dominant balance will be between the first  
401 and third terms on the right-hand side, giving

$$\Delta \approx -\frac{1}{r}(\partial_\tau u + D\partial_x^2 u)p_{\text{neut}}, \quad (12)$$

402 where  $p_{\text{neut}}$  is the value of  $p$  ignoring the perturbation caused by the sweep,  
403 i.e.,  $p_{\text{neut}} = \frac{1}{\sqrt{4\pi D\tau}} \exp\left(-\frac{x^2}{4D\tau}\right)$ . We can simplify this further by noting that  $u$   
404 solves Fisher's equation:

$$\partial_\tau u + D\partial_x^2 u = -su(1-u). \quad (13)$$

405 (Recall that  $\tau$  is backward time.) Using this relation and substituting Eq. 12  
406 into Eq. 11, we have

$$\lim_{\tau \rightarrow \infty} \langle X \rangle = \frac{2Ds}{r} \int d\tau \int dx \partial_x u p_{\text{neut}}. \quad (14)$$

407 We are interested in the effect of a long-past sweep. Let  $\tau_0$  be the time at  
408 which the wave of advance passed the point where we sampled the allele; we will  
409 take  $\tau_0$  to be extremely large. At time  $\tau_0$ ,  $p_{\text{neut}}$  has width  $\sim \sqrt{D\tau_0}$ , so the wave  
410 crosses the region where the ancestor might have lived in a time  $\sim \sqrt{D\tau_0}/c \ll \tau_0$ ,  
411 and the integral in Eq. 14 is dominated by times  $\tau$  in the approximate range  
412  $|\tau - \tau_0| \lesssim \sqrt{D\tau_0}/c$ . Since  $\tau$  does not vary by much (proportionately) in this  
413 interval,  $p_{\text{neut}}(x, \tau) \approx p_{\text{neut}}(x, \tau_0)$  is approximately constant in  $\tau$ . Using this  
414 approximation in Eq. 14 yields

$$\begin{aligned} \lim_{\tau \rightarrow \infty} \langle X \rangle &\approx \frac{2Ds}{r} \int dx p_{\text{neut}}(x, \tau_0) \int d\tau \partial_x u \\ &= \frac{2Ds}{r}(1) \left(-\frac{1}{c}\right) \\ &= -c/(2r). \end{aligned} \quad (15)$$



415 Note that this result did not depend on the form of  $p_{\text{neut}}$ , only that it was  
 416 approximately constant in time; in particular, it also holds if the ancestry settles  
 417 down to a stationary distribution, as in Eq. 3.

#### 418 **Effects of noise on sweeps**

419 In Eq. 13 above, we have assumed that sweeps spread as smooth, deterministic  
 420 waves. In fact, for finite  $\rho$ , they will be stochastic, and this will tend to reduce  
 421 their speed  $c$  (see, e.g., Brunet et al. (2006); Hallatschek and Korolev (2009); and  
 422 the references in Barton et al. (2013)). We have not attempted a full stochastic  
 423 derivation of Eq. 15; instead, we simply use the noise-adjusted speed for  $c$ . In  
 424 one dimension, this is (Barton et al. (2013), Eq. 5):

$$c \approx 2\sqrt{Ds} \left( 1 - \frac{\pi^2}{2 \log^2(\rho\sqrt{Ds})} \right). \quad (16)$$

425 The speed  $c$  approaches  $2\sqrt{Ds}$  as  $\rho\sqrt{Ds} \rightarrow \infty$ , but only very slowly, so the  
 426 finite-density correction usually cannot be neglected. It is not obvious that  
 427 substituting Eq. 16 into the final expression Eq. 15 gives the correct answer.  
 428 We could alternatively, for instance, substitute into the previous line, but this  
 429 would give the implausible result that the reduction in  $c$  causes an *increase*  
 430 in the pull of sweeps. The close agreement between the analytical predictions  
 431 and simulations in the left panel of Fig. 1 and in Fig. 3 (in which the finite-  
 432 density correction reduces  $c$  by approximately 40%) is the best argument that  
 433 the approach suggested is correct.

#### 434 **Other kinds of loosely-linked sweep**

435 Above, we have assumed that the sweeping allele spread according to Fisher's  
 436 equation, Eq. 13, which describes an allele with a constant selective advantage  
 437  $s$ . However, the allele may have a varying selective advantage if, for instance,  
 438 dominance or frequency-dependent effects are important, or if there is environ-  
 439 mental variation. More generally, the changing allele frequency is described  
 440 by

$$\partial_\tau u + D\partial_x^2 u = -sf(u, x, \tau)u(1 - u) \quad (17)$$

441 for some function  $f$ .

442 Otherwise, the derivation of the expected displacement is the same as above,  
 443 and we have

$$\lim_{\tau \rightarrow \infty} \langle X \rangle \approx \frac{2Ds}{r} \int dx p_{\text{neut}}(x, \tau_0) \int d\tau f(u, x, \tau) \partial_x u. \quad (18)$$

444 Assuming that  $f$  is such that  $u(x, \tau)$  is still a traveling wave moving at some  
 445 speed  $c$ , we can change variables in the second integral to obtain:

$$\lim_{\tau \rightarrow \infty} \langle X \rangle \approx -\frac{2Ds}{rc} \int dx p_{\text{neut}}(x, \tau_0) \int_0^1 du f(u, x, \tau(x, u)). \quad (19)$$

## 446 Effect of tightly-linked sweeps

447 We wish to calculate  $\phi(x)$  for large  $x$ , including the effect of occasional tightly-  
 448 linked sweeps. It is easiest to consider  $\int_x^L dy \rho(y)\phi(y)$ , which we can think of as  
 449 the probability that at some time  $t_0$  in the distant past, the ancestor of a present-  
 450 day individual was at a distance greater than  $x$  from the center. For large  $x$ ,  
 451 we expect that this is dominated by the probability that it was pulled there by  
 452 a 'recent' tightly-linked sweep  $t$  generations 'before'  $t_0$  (i.e.,  $t$  generations closer  
 453 to the present), with  $t$  not too large. This sweep must have pulled the lineage  
 454 out to a distance of at least  $xe^{t/t_{\text{con}}}$  for it still to be at a distance of at least  $x$   
 455  $t$  generations 'later', and therefore the sweep must have originated a distance  
 456  $z > xe^{t/t_{\text{con}}}$  from the center. Given that it did, the probability that it pulled the  
 457 lineage out far enough is  $\exp[-\frac{rx}{c}e^{t/t_{\text{con}}}]$ . Putting this all together, and using  
 458 that the density of sweeps per generation per unit map length per distance (or  
 459 area in two dimensions) at distance  $z$  from the center and genetic map distance  
 460  $r$  from the focal locus is  $2\Lambda/(fKL)$  (or  $4\Lambda z/(fKL^2)$  in two dimensions), the  
 461 expected number of sweeps that would have left the lineage more than  $x$  from  
 462 the center at time  $t_0$  is:

$$\begin{aligned} \int_x^L dy \rho(y)\phi(y) &\approx \frac{2\Lambda}{fKL^d} \int_0^{t_{\text{con}} \log \frac{L}{x}} dt \int_{xe^{\frac{t}{t_{\text{con}}}}}^L dz (2z)^{d-1} \int dr e^{-\frac{rx}{c}e^{\frac{t}{t_{\text{con}}}}} \\ &= \frac{2L}{Kx} \times \begin{cases} 1 - (1 + \log(L/x))x/L & \text{for } d = 1 \\ (L-x)^2/L^2 & \text{for } d = 2. \end{cases} \end{aligned} \quad (20)$$

463 Taking the derivative of both sides of Eq. 20 with respect to  $x$  gives the proba-  
 464 bility density, Eq. 4.

465 Note that Eq. 20 approximates the probability that there is at least one  
 466 tightly-linked sweep by the expected number of such sweeps, so it is only valid  
 467 when the right-hand side is small,  $x \gg 2L/K$ . It also obviously typically breaks  
 468 down as  $x$  approaches  $L$  and the particular geometry of the habitat begins to  
 469 matter.

## 470 Isolation by distance

471 We wish to find the probability  $\psi(x)$  that a pair of lineages a distance  $x$  apart  
 472 will be identical at a neutral locus. Let us assume that the locus is far from  
 473 any recent sweeps. (We relax this assumption below.) Then tracing the an-  
 474 cestry back in time, the separation  $X_\tau$  between them can be approximated by  
 475 a Brownian motion, with diffusion constant  $2D$  (since it combines the motion  
 476 of both lineages), and with the lineages moving together at a mean velocity of  
 477  $\approx -\Lambda c X/fL = -X/t_{\text{con}}$  from (unlinked) sweeps that start in between them. In  
 478 other words, we can approximate the motion by

$$dY_\tau = -t_{\text{con}}^{-1} Y_\tau d\tau + 2\sqrt{D} dB_\tau, \quad (21)$$

479 where  $B$  is a Brownian motion. We write  $Y$  to emphasize that this is not quite  
 480 the same as the real path of the lineages  $X$ . In particular, unlike  $X$ ,  $Y$  does  
 481 not include coalescence. (In two dimensions,  $Y$  fails to approximate  $X$  even  
 482 when the lineages are just very close together, but since most of the coalescence  
 483 time will be spent at some distance away, it is still a useful approximation.)  
 484 In addition, Eq. 21 ignores the fact that  $X$  cannot exceed the diameter of the  
 485 range  $2L$ , and so will only be valid for ranges sufficiently large that lineages are  
 486 unlikely to bump into the boundaries.

487 We would like to find an explicit form for Eq. 6. To do this, we can rewrite in  
 488 terms of the behavior of  $Y$ . First, note that the rate of coalescence for the two  
 489 lineages when they are in the same place is  $1/\rho$ , and therefore the probability  
 490 density of coalescence at time  $\tau$  is  $\approx \frac{\delta(Y_\tau)}{\rho} \exp\left(-\int_0^\tau d\tau' \frac{\delta(Y_{\tau'})}{\rho}\right)$ , where  $\delta$  is the  
 491 Dirac delta. (The exponential factor accounts for the possibility that the two  
 492 lineages have already coalesced.) Plugging this into Eq. 6 gives:

$$\begin{aligned} \psi(x) &= E_X \left[ e^{-2\mu T} \mid |X_0| = x \right] \\ &\approx E_Y \left[ \int_0^\infty d\tau \frac{\delta(Y_\tau)}{\rho} e^{-2\mu\tau - \int_0^\tau d\tau' \delta(Y_{\tau'})/\rho} \mid |Y_0| = x \right]. \end{aligned} \quad (22)$$

493 We can use the Feynman-Kac formula (Pham (2009), p25) to rewrite Eq. 22  
 494 as an ordinary differential equation:

$$0 = 2D\psi'' + \left(2D\frac{d-1}{x} - \frac{x}{t_{\text{con}}}\right)\psi' - 2\mu\psi + \frac{1}{\rho}\delta(x)(1-\psi), \quad (23)$$

495 where  $\delta$  is the Dirac delta. Eq. 23 breaks down for  $x \rightarrow 0$  in  $d = 2$  dimensions; in  
 496 this case, some kind of small-scale cutoff is needed, but this does not change the  
 497 shape of  $\psi(x)$  at larger scales. In one dimension, to handle the  $x = 0$  boundary,  
 498 we need to understand what we mean by  $\psi''$  and  $\psi'$  at  $x = 0$ . The correct  
 499 interpretation is that  $x$  is actually the *signed* distance between the lineages, i.e.,  
 500 we should remove the absolute value signs around  $X_0$  and  $Y_0$  in Eq. 22 (Barton  
 501 et al., 2002). Thus  $\psi(x) = \psi(-x)$ ,  $\lim_{x \rightarrow 0^-} \psi'(x) = -\lim_{x \rightarrow 0^+} \psi'(x)$ , and  $\psi'$   
 502 has a discontinuity at  $x = 0$ , i.e.,  $\psi''$  has a singularity that must cancel with  
 503 the last term in Eq. 23. This coalescent term can therefore be seen as just a  
 504 boundary condition that sets the overall normalization of  $\psi$ . Explicitly, we have:

$$\lim_{x \rightarrow 0^+} \psi'(x) = \frac{1 - \psi(0)}{4D\rho}. \quad (24)$$

The solution to Eq. 23 can be written exactly in terms of special functions. For  $d = 1$  and  $x > 0$ , Eq. 23 is the Hermite equation, with solution:

$$\begin{aligned} \psi(x) &= AH_{-2\mu t_{\text{con}}}\left(\frac{x}{2x_c}\right) \\ &= A2^{-\mu t_{\text{con}}} e^{\frac{x^2}{8x_c^2}} D_{-2\mu t_{\text{con}}}\left(\frac{x}{\sqrt{2}x_c}\right), \end{aligned} \quad (25)$$

505 where  $H_\nu(z)$  is a Hermite function and  $D_\nu(z)$  is a parabolic cylinder function  
 506 (Wolfram Research (2017) functions `HermiteH` and `ParabolicCylinderD`, re-  
 507 spectively), and  $x_c = \sqrt{Dt_{\text{con}}}$ .  $A$  is a normalization constant, fixed by Eq. 24  
 508 to be:

$$A = \frac{2\Gamma(2\mu t_{\text{con}})}{\Gamma(\mu t_{\text{con}}) + 4\rho\sqrt{D/t_{\text{con}}}\Gamma(\mu t_{\text{con}} + 1/2)}, \quad (26)$$

509 where  $\Gamma$  is the gamma function.

We have not been able to find an exact closed-form expression for the inverse Laplace transform of Eq. 25 (i.e., the distribution of coalescence times) but the mean pairwise coalescent time  $\tau_2$  is:

$$\begin{aligned} \tau_2(x) &= -\frac{1}{2} \left. \frac{\partial \psi(x)}{\partial \mu} \right|_{\mu=0} \\ &= 2\sqrt{\pi}\rho x_c + t_{\text{con}} \left( \frac{\gamma}{2} + \left. \frac{\partial H_\nu(x/2x_c)}{\partial \nu} \right|_{\nu=0} \right) \\ &\approx 2\sqrt{\pi}\rho x_c + t_{\text{con}} \left( \frac{\gamma}{2} + \ln(x/x_c) \right) \text{ for } x \gg x_c, \end{aligned} \quad (27)$$

510 where  $\gamma \approx 0.577$  is the Euler-Mascheroni constant. Note that two randomly-  
 511 sampled individuals will typically be a distance  $\sim L$  apart, so the mean pairwise  
 512 coalescence time over the whole population can be roughly approximated by  
 513  $\tau_2(L)$ .

514 For large separations  $x \gg x_c\sqrt{2 + 4\mu t_{\text{con}}}$ , Eq. 25 is approximately:

$$\psi(x) \approx A \left( \frac{x}{x_c} \right)^{-2\mu t_{\text{con}}}. \quad (28)$$

515 Notice that  $\psi$  decays only as a power of distance. Up to the normalization  
 516 constant, Eq. 28 is also valid in two dimensions. For  $\mu t_{\text{con}} \ll 1$ , Eq. 26 ap-  
 517 proaches  $A \approx 1/(1 + 4\sqrt{\pi}\rho x_c)$ , and Eq. 28 approaches the Laplace transform  
 518 of a simple convolution: first, a nearly deterministic concentration phase last-  
 519 ing  $t_{\text{con}} \log(x/x_c)$  generations, followed by an exponentially-distributed phase  
 520 with mean  $2\sqrt{\pi}\rho x_c$ , consistent with Eq. 27. In other words, first the lineages  
 521 are pulled to within  $\sim x_c$  of each other, and then undergo neutral coalescence  
 522 within an effective range of radius  $\sim x_c$ .

523 For  $\mu t_{\text{con}} \gg 1$  and  $x \lesssim 2x_c\sqrt{\mu t_{\text{con}}}$ , the pull of sweeps is too slow to affect  
 524 relatedness (by the time the lineages have been pulled together an appreciable  
 525 distance they will have already mutated), and the solutions to Eq. 23 are close  
 526 to the neutral solutions in Barton et al. (2002),  $\psi(x) \propto x^{(1-d)/2} e^{-\sqrt{\mu/D}x}$  (their  
 527 Eqs. (10) and (14)).

## 528 Tightly-linked sweeps

529 Above, we have focused on regions of the genome far from any recent sweeps.  
 530 Ideally, however, we would like to be able to extend our analysis to include  
 531 recently-swept regions. As a first approximation, we can say that the main effect

532 of tightly-linked sweeps is that they can cause two widely-separated lineages to  
533 rapidly coalesce. The probability that a sweep recombining at rate  $r$  with the  
534 focal neutral locus will cause coalescence between two lineages separated by  $x$   
535 is  $\approx \exp(-rx/c)/(1 + 2r\Upsilon)$ , where  $\Upsilon$  is mean coalescence time for two lineages  
536 inside the wavefront of the sweep (Barton et al., 2013). We can therefore account  
537 for the effect of sweeps uniformly distributed over the genome by changing the  
538 coalescence kernel in Eq. 22 from  $\delta(x)/\rho$  to

$$p_{\text{coal}}(x) \approx \delta(x)/\rho + \frac{2\Lambda}{fK} \int_0^\infty dr \frac{e^{-rx/c}}{1 + 2r\Upsilon} \\ \approx \frac{2\Lambda}{fK} \frac{c}{x} \text{ for } x \gg c\Upsilon.$$

539 For  $x \gg c\Upsilon$ , Eq. 23 then becomes

$$0 = 2D\psi'' + \left(2D\frac{d-1}{x} - \frac{x}{t_{\text{con}}}\right)\psi' - 2\mu\psi + \frac{2\Lambda}{fK} \frac{c}{x}(1 - \psi).$$

540 For large  $x$ , there are two possible tail behaviors for the solution. If  $2\mu t_{\text{con}} < 1$ ,  
541 then the pull of unlinked sweeps is strong enough that it is likely to bring lineages  
542 close together before they mutate, and  $\psi \propto x^{-2\mu t_{\text{con}}}$  as above. For  $2\mu t_{\text{con}} > 1$ ,  
543 only recently-swept loci share recent enough ancestry to be likely to be identical  
544 in distant individuals, and  $\psi \propto x^{-1}$ .

## 545 References

- 546 Barton, N. H., F. Depaulis, and A. M. Etheridge. 2002. Neutral Evolution in  
547 Spatially Continuous Populations. *Theoretical Population Biology* 61:31–48.
- 548 Barton, N. H., and A. M. Etheridge. 2011. The relation between reproductive  
549 value and genetic contribution. *Genetics* 188:953–973.
- 550 Barton, N. H., A. M. Etheridge, J. Kelleher, and A. Véber. 2013. Genetic  
551 hitchhiking in spatially extended populations. *Theoretical Population Biology*  
552 87:75–89.
- 553 Barton, N. H., and G. M. Hewitt. 1985. Analysis of hybrid zones. *Annual review*  
554 *of Ecology and Systematics* 16:113–148.
- 555 Brunet, E., B. Derrida, A. H. Mueller, and S. Munier. 2006. Phenomenological  
556 theory giving the full statistics of the position of fluctuating pulled fronts.  
557 *Physical Review E* 73:056126.
- 558 Fisher, R. A. 1937. The wave of advance of advantageous genes. *Annals of*  
559 *Eugenics* 7:355–369.
- 560 Gillespie, J. H. 2000. Genetic drift in an infinite population: the pseudohitch-  
561 hiking model. *Genetics* 155:909–919.

- 562 Hallatschek, O., and D. S. Fisher. 2014. Acceleration of evolutionary spread  
563 by long-range dispersal. *Proceedings of the National Academy of Sciences*  
564 111:E4911–4919.
- 565 Hallatschek, O., and K. S. Korolev. 2009. Fisher Waves in the Strong Noise  
566 Limit. *Physical Review Letters* 103:108103.
- 567 Hallatschek, O., and D. R. Nelson. 2008. Gene surfing in expanding populations.  
568 *Theoretical Population Biology* 73:158–170.
- 569 Hermisson, J., and P. S. Pennings. 2005. Soft Sweeps: Molecular Population  
570 Genetics of Adaptation From Standing Genetic Variation. *Genetics* 169:2335–  
571 2352.
- 572 Kim, Y., and W. Stephan. 2003. Selective sweeps in the presence of interference  
573 among partially linked loci. *Genetics* 164:389–98.
- 574 Labbé, P., C. Berticat, A. Berthomieu, S. Unal, C. Bernard, M. Weill, and  
575 T. Lenormand. 2007. Forty Years of Erratic Insecticide Resistance Evolution  
576 in the Mosquito *Culex pipiens*. *PLOS Genetics* 3:e205.
- 577 Lenormand, T., D. Bourguet, T. Guillemaud, and M. Raymond. 1999. Tracking  
578 the evolution of insecticide resistance in the mosquito *Culex pipiens*. *Nature*  
579 400:861–864.
- 580 Martens, E. A., and O. Hallatschek. 2011. Interfering waves of adaptation  
581 promote spatial mixing. *Genetics* 189:1045–1060.
- 582 Maruyama, T. 1970. On the fixation probability of mutant genes in a subdivided  
583 population. *Genet Res* 15:221–225.
- 584 Maruyama, T. 1971. An invariant property of a structured population. *Genet*  
585 *Res* 18:81–84.
- 586 Nagylaki, T. 1978. Random genetic drift in a cline. *Proceedings of the National*  
587 *Academy of Sciences* 75:423–426.
- 588 Pham, H. 2009. *Continuous-Time Stochastic Control and Optimization with Fi-*  
589 *nancial Applications. Stochastic modelling and applied probability*, Springer-  
590 *Verlag*.
- 591 Ralph, P., and G. Coop. 2010. Parallel Adaptation: One or Many Waves of  
592 Advance of an Advantageous Allele? *Genetics* 186:647–668.
- 593 Rosen, M. J., M. Davison, D. Bhaya, and D. S. Fisher. 2015. Fine-scale diversity  
594 and extensive recombination in a quasisexual bacterial population occupying  
595 a broad niche. *Science* 348:1019–1023.
- 596 Sattath, S., E. Elyashiv, O. Kolodny, Y. Rinott, and G. Sella. 2011. Pervasive  
597 Adaptive Protein Evolution Apparent in Diversity Patterns around Amino  
598 Acid Substitutions in *Drosophila simulans*. *PLoS Genetics* 7:e1001302.

- 599 Weissman, D. B., and N. H. Barton. 2012. Limits to the Rate of Adaptive  
600 Substitution in Sexual Populations. *PLoS Genetics* 8:e1002740.
- 601 Wolfram Research. 2017. The Wolfram Functions Site. URL  
602 <http://functions.wolfram.com>.
